# Supplementary material for: Application of Fungus Enzymes in Spent Mushroom Composts from Edible Mushroom Cultivation for Phthalate Removal
Source: MDPI journal article supplement (doi:10.3390/microorganisms9091989), 2021-09-19
Supplement: s1 [file s1]

Supplementary Table S1. Six mediators used in this study.

| Compounds                                                | Abbreviation | CAS No.    | Structure                                                                             |
|----------------------------------------------------------|--------------|------------|---------------------------------------------------------------------------------------|
| Acetosyringone                                           | AS           | 2478-38-8  | 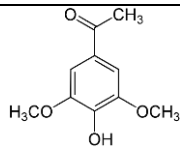   |
| Syringaldehyde                                           | SA           | 134-96-3   |    |
| 2,2'-azino-bis (3-ethylbenzothiazoline-6-sulphonic acid) | ABTS         | 30931-67-0 |     |
| N-Hydroxyphthalimide                                     | HPI          | 524-38-9   |    |
| Vanillin                                                 | VA           | 121-33-5   |   |
| (2,2,6,6-Tetramethylpiperidin-1-yl) oxyl                 | TEMPO        | 2564-83-2  |  |
