# Supplementary material for: Application of Fungus Enzymes in Spent Mushroom Composts from Edible Mushroom Cultivation for Phthalate Removal
Source: MDPI journal article supplement (doi:10.3390/microorganisms9091989), 2021-09-19
Supplement: s1 [file s1]

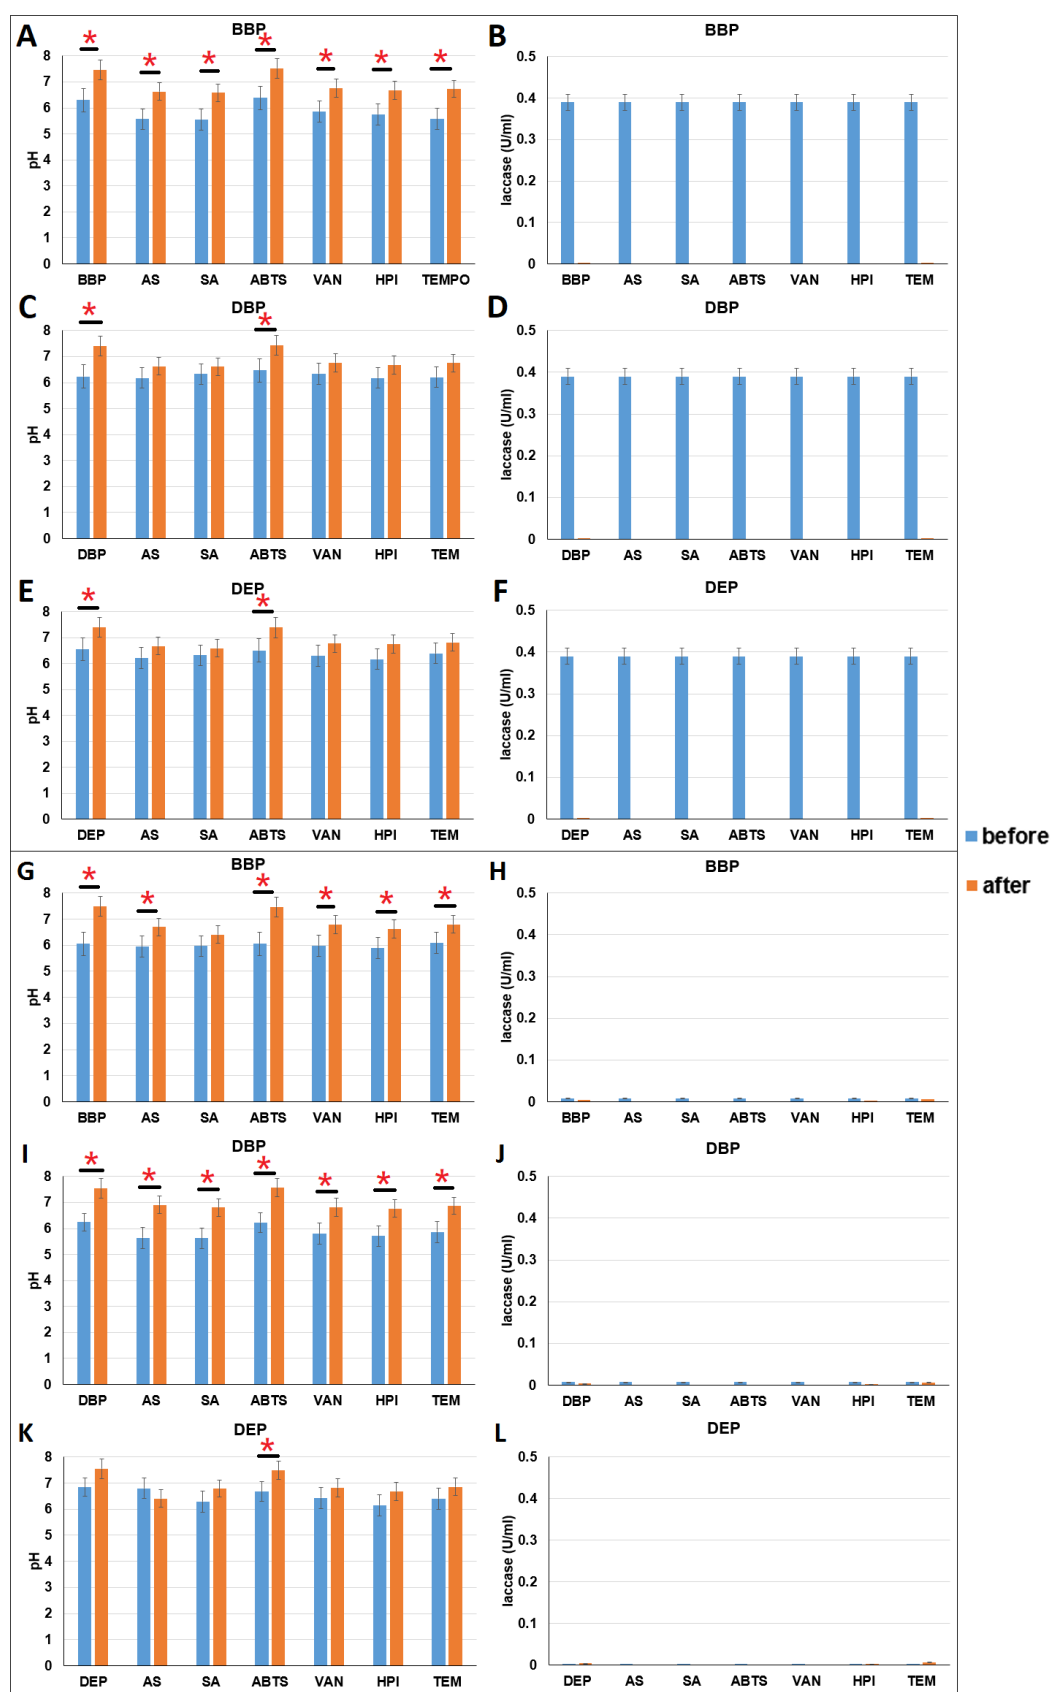

**Supplementary Figure S1.** Laccase activity and pH values of SMC enzyme extracts from *P. ostreatus* (A–F) and *A. polytricha* (G–L) before and after batch experiments. Red stars indicate the p-values of paired t-tests < 0.05. Data from triplicate experiments are presented as the mean  $\pm$  SE. BBP: benzyl butyl phthalate, DBP: di-n-butyl phthalate, DEP: diethyl phthalate, AS: acetosyringone, SA: syringaldehyde, ABTS: 2,2'-azino-bis(3-ethylbenzothiazoline-6-sulphonic acid), VAN: vanillin, HPI: N-Hydroxyphthalimide, TEM: (2,2,6,6-Tetramethylpiperidin-1-yl) oxyl.

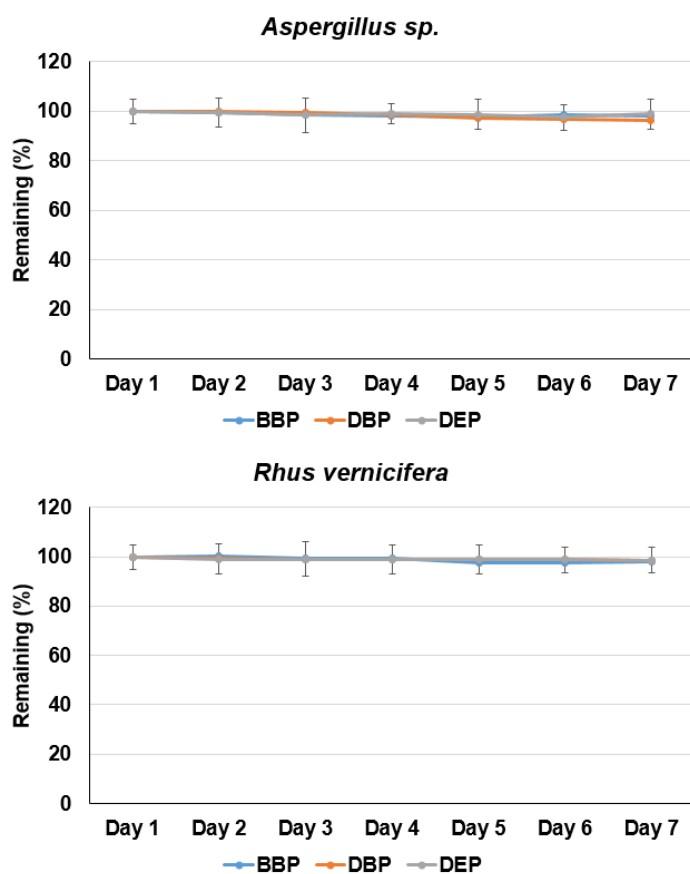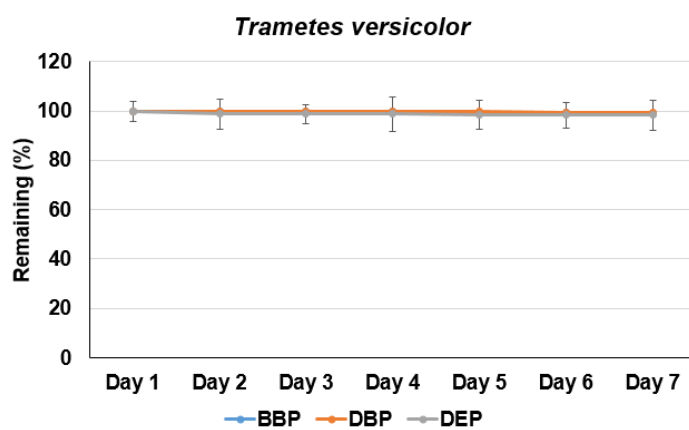

**Supplementary Figure S2.** Tests of phthalate (2 ppm) removal using laccases from *Aspergillus sp.*, *Rhus vernicifera*, and *Trametes versicolor*. BBP: benzyl butyl phthalate, DBP: di-n-butyl phthalate, DEP: diethyl phthalate.
